# Supplementary material for: Runoff component quantification and future streamflow projection in a large mountainous basin based on a multidata-constrained cryospheric-hydrological model
Source: Copernicus journal article supplement (doi:10.5194/egusphere-2024-1464), 2024-07-11
Supplement: Supplementary file 1 [file egusphere-2024-1464-supplement.pdf]

# 1 Supplementary Tables and Figures

2 **Table S1** Calibrated parameters of the THREW model in this study.

| No. | Symbol  | Unit                                  | Description                                                                                                                                                                                                                                                                                                                                                                    | Range  |
|-----|---------|---------------------------------------|--------------------------------------------------------------------------------------------------------------------------------------------------------------------------------------------------------------------------------------------------------------------------------------------------------------------------------------------------------------------------------|--------|
| 1   | kv      | –                                     | Fraction of potential transpiration rate over potential evaporation                                                                                                                                                                                                                                                                                                            | 0~0.8  |
| 2   | nt      | –                                     | Manning roughness coefficient for hillslope                                                                                                                                                                                                                                                                                                                                    | 0~0.2  |
| 3   | GaIFL   | –                                     | Spatial heterogeneous coefficient of infiltration capacity                                                                                                                                                                                                                                                                                                                     | 0~0.7  |
| 4   | GaEFL   | –                                     | Spatial heterogeneous coefficient of exfiltration capacity                                                                                                                                                                                                                                                                                                                     | 0~0.7  |
| 5   | GaETL   | –                                     | Spatial heterogeneous coefficient of evapotranspiration capacity                                                                                                                                                                                                                                                                                                               | 0~0.7  |
| 6   | WM      | m                                     | Tension water storage capacity                                                                                                                                                                                                                                                                                                                                                 | 0~2    |
| 7   | B       | –                                     | Shape coefficient for calculating the saturation excess streamflow area                                                                                                                                                                                                                                                                                                        | 0~1    |
| 8   | Gatr    | –                                     | Coefficient representing spatial heterogeneity of exchange term between t-zone and r-zone                                                                                                                                                                                                                                                                                      | 0~10   |
| 9   | KKA     | –                                     | Coefficient to calculate subsurface runoff in $R_g = KKD \cdot S \cdot K_s^S \left(\frac{y^S}{Z}\right)^{KKA}$ , where $S$ is the topographic slope, $K_s^S$ is the saturated hydraulic conductivity, $y^S$ is the depth of saturated groundwater, $Z$ is the total soil depth                                                                                                 | 0~6    |
| 10  | KKD     | –                                     | See description for $KKA$                                                                                                                                                                                                                                                                                                                                                      | 0~0.5  |
| 11  | $C_1$   | –                                     | Coefficient to calculate the runoff concentration process using Muskingum method: $O_2 = C_1 \cdot I_1 + C_2 \cdot I_2 + C_3 \cdot O_1 + C_4 \cdot Q_{lat}$ , where $I_1$ and $O_1$ is the inflow and outflow at prior step, $I_2$ and $O_2$ is the inflow and outflow at current step, $Q_{lat}$ is lateral flow of the river channel, $C_3 = 1 - C_1 - C_2, C_4 = C_1 + C_2$ | 0~1    |
| 12  | $C_2$   | –                                     | See description for $C_1$                                                                                                                                                                                                                                                                                                                                                      | 0~1    |
| 13  | LL      | –                                     | cover area in $SCA = A \cdot \left(\frac{SWE}{WMAX}\right)^{LL}$                                                                                                                                                                                                                                                                                                               | 0~1    |
| 14  | $T_0$   | °C                                    | Temperature threshold above which snow and glacier melt                                                                                                                                                                                                                                                                                                                        | -5~5   |
| 15  | $T_1$   | °C                                    | Temperature threshold for separating rainfall and snowfall                                                                                                                                                                                                                                                                                                                     | -5~5   |
| 16  | $DDF_s$ | mm °C <sup>-1</sup> day <sup>-1</sup> | Degree day factor for snowmelt                                                                                                                                                                                                                                                                                                                                                 | 0~10   |
| 17  | $DDF_g$ | mm °C <sup>-1</sup> day <sup>-1</sup> | Degree day factor for glacier melt                                                                                                                                                                                                                                                                                                                                             | 0~10   |
| 18  | SHmax   | –                                     | Threshold for snow sublimation ratio                                                                                                                                                                                                                                                                                                                                           | 0~1    |
| 19  | SHsd    | mm                                    | Reference depth of snow sublimation                                                                                                                                                                                                                                                                                                                                            | 1.1~20 |

3 **Table S2** The optimal value of the THREW model parameters by various calibration variants,

| No. | Parameter | D           | DG    | DS    | DSG   | ALL   |         |         |       |
|-----|-----------|-------------|-------|-------|-------|-------|---------|---------|-------|
|     |           | Whole basin |       |       |       | Nuxia | Yangcun | Nugesha | Lazi  |
| 1   | kv        | 0.634       | 0.568 | 0.653 | 0.228 | 0.699 | 0.748   | 0.767   | 0.492 |
| 2   | nt        | 0.072       | 0.014 | 0.031 | 0.050 | 0.076 | 0.014   | 0.198   | 0.043 |
| 3   | GaIFL     | 0.169       | 0.174 | 0.138 | 0.328 | 0.618 | 0.288   | 0.311   | 0.005 |
| 4   | GaEFL     | 0.402       | 0.483 | 0.391 | 0.537 | 0.438 | 0.396   | 0.115   | 0.594 |
| 5   | GaETL     | 0.272       | 0.206 | 0.116 | 0.050 | 0.543 | 0.449   | 0.023   | 0.559 |
| 6   | WM        | 1.458       | 0.669 | 1.842 | 0.656 | 1.118 | 0.804   | 1.749   | 0.706 |
| 7   | B         | 0.866       | 0.510 | 0.351 | 0.726 | 0.284 | 0.535   | 0.466   | 0.956 |
| 8   | Gatr      | 3.120       | 2.566 | 4.213 | 2.536 | 5.649 | 4.007   | 7.280   | 8.136 |
| 9   | KKA       | 2.167       | 5.523 | 3.070 | 4.966 | 5.734 | 5.282   | 5.916   | 5.200 |

|    |                  |        |        |        |        |        |        |        |        |
|----|------------------|--------|--------|--------|--------|--------|--------|--------|--------|
| 10 | KKD              | 0.269  | 0.249  | 0.122  | 0.180  | 0.307  | 0.137  | 0.463  | 0.368  |
| 11 | C <sub>1</sub>   | 0.006  | 0.550  | 0.121  | 0.032  | 0.149  | 0.127  | 0.238  | 0.017  |
| 12 | C <sub>2</sub>   | 0.784  | 0.448  | 0.664  | 0.833  | 0.777  | 0.728  | 0.463  | 0.230  |
| 13 | LL               | 0.796  | 0.467  | 0.724  | 0.870  | 0.821  | 0.756  | 0.666  | 0.555  |
| 14 | T <sub>0</sub>   | -2.337 | -2.745 | -4.856 | -3.142 | -3.451 | -4.850 | -4.889 | -4.659 |
| 15 | T <sub>1</sub>   | 2.240  | 2.267  | -0.144 | 0.384  | -2.192 | 1.693  | -2.672 | 4.527  |
| 16 | DDF <sub>s</sub> | 4.188  | 7.725  | 7.901  | 8.383  | 4.799  | 8.760  | 8.440  | 3.903  |
| 17 | DDF <sub>g</sub> | 5.875  | 4.515  | 6.458  | 3.971  | 2.708  | 2.614  | 4.259  | 3.101  |
| 18 | SHmax            | 0.332  | 0.527  | 0.796  | 0.797  | 0.797  | 0.799  | 0.786  | 0.799  |
| 19 | SHsd             | 9.991  | 11.913 | 1.224  | 1.104  | 1.186  | 1.366  | 1.126  | 1.147  |

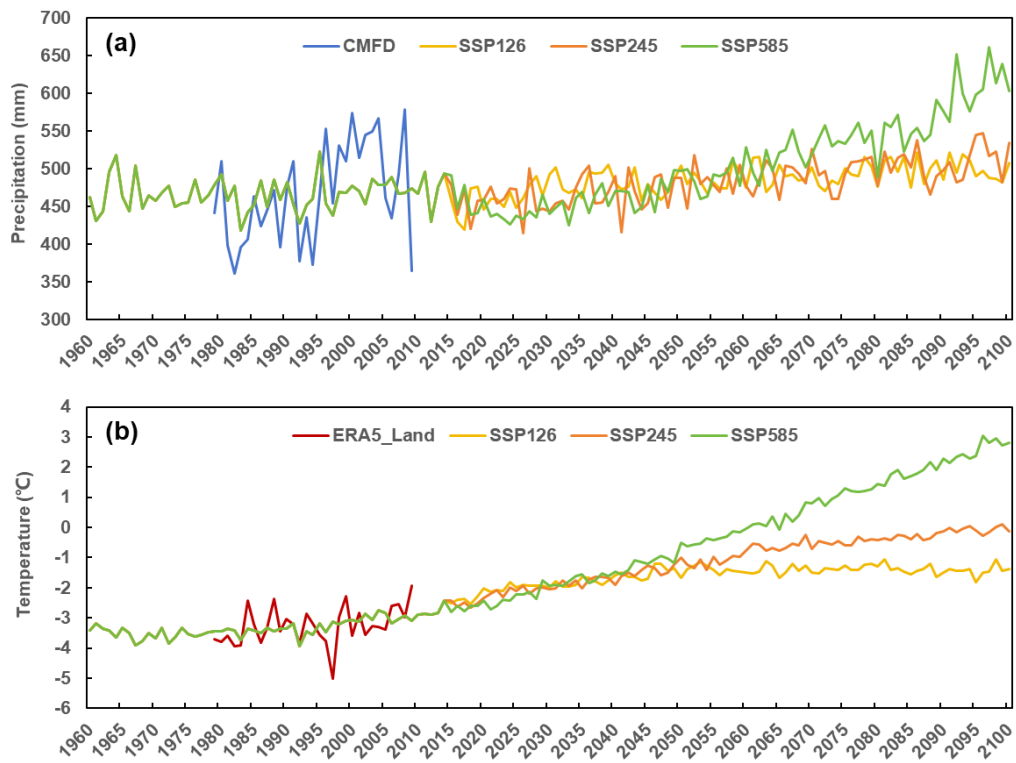

Figure S1 Average annual precipitation (a) and temperature (b) of 10 bias-corrected CMIP6 GCMs during 1960–2100 in the YTR basin.

4  
5  
6
